# Supplementary material
Source: Springer Nature journal article supplement (http://www.nature.com/nbt/journal/v19/n10/extref/nbt1001-946-S1.pdf)
Supplement: nbt1001-946-S1.pdf [file nbt1001-946-S1.pdf]

**"Quantitative profiling of differentiation-induced microsomal proteins using isotope-coded affinity tags and mass spectrometry," by D.K. Han *et al.***

**Supplementary Table 1. Summary of proteins identified and quantified**

Protein names are given according to the NCBI protein database nomenclature (<http://www.ncbi.nlm.nih.gov>) and accessible by typing the protein name in either NUCLEOTIDE or PROTEIN databases. Protein description was extracted from the same databases. *n* indicates the number of independent identification and quantitation events for each protein. Abundance ratios are shown as ratio of d0:d8 peptide signals (d0, naïve cells; d8, PMA-treated cells). s.d., standard deviation. N/A, not applicable.

| <b>Protein identified</b> | <b>Protein description</b>                                       | <b><i>n</i></b> | <b>d0:d8</b> | <b>s.d.</b> |
|---------------------------|------------------------------------------------------------------|-----------------|--------------|-------------|
| FDFT_HUMAN                | Human farnesyl-diphosphate farnesyltransferase                   | 6               | 0.05         | 0.02        |
| AB033059                  | <i>Homo sapiens</i> mRNA for KIAA1233 protein                    | 2               | 0.07         | N/A         |
| GARP_HUMAN                | Human Garp protein                                               | 2               | 0.07         | N/A         |
| AF059617                  | Tyrosine kinase protein                                          | 2               | 0.11         | N/A         |
| AF004319                  | Human anti-melanoma Ig heavy-chain variable region               | 2               | 0.12         | 0.04        |
| AJ245346                  | 1A-3GP5 Immunoglobulin $\gamma$ -chain                           | 2               | 0.12         | 0.14        |
| GB01_HUMAN                | Human guanine nucleotide-binding protein G(0) alpha              | 2               | 0.15         | 0.05        |
| AF222749                  | C2H2-type zinc finger protein                                    | 2               | 0.20         | N/A         |
| KLF2_HUMAN                | Human Kruppel-like factor                                        | 2               | 0.20         | 0.1         |
| AB011535                  | <i>Homo sapiens</i> mRNA for MEGF1,                              | 2               | 0.21         | N/A         |
| AB041615                  | <i>Homo sapiens</i> cDNA FLJ11123                                | 3               | 0.22         | 0.11        |
| AF117230                  | Protein x 0001                                                   | 2               | 0.22         | N/A         |
| PTK7_HUMAN                | Human protein tyrosine kinase 7, CCK-4                           | 2               | 0.22         | 0.05        |
| RT12_HUMAN                | Human 40S ribosomal protein s12                                  | 2               | 0.22         | 0.2         |
| AF043250                  | TOM40 Mitochondrial outer membrane protein                       | 2               | 0.23         | 0.03        |
| AB007935                  | <i>Homo sapiens</i> mRNA for KIAA0466 protein                    | 2               | 0.26         | 0.05        |
| DDH2_HUMAN                | Human dimethylarginine dimethylaminohydrolase 2                  | 2               | 0.29         | 0.04        |
| SL53_HUMAN                | Human sodium/myo-inositol cotransporter                          | 4               | 0.29         | 0.18        |
| Y084_HUMAN                | Human hypothetical protein KIAA0084                              | 2               | 0.29         | 0.06        |
| AB037742                  | Human brain cDNA                                                 | 2               | 0.30         | 0.20        |
| AB037819                  | Human brain cDNA                                                 | 2               | 0.32         | N/A         |
| AF262164                  | cp1-020 Immunoglobulin                                           | 2               | 0.33         | N/A         |
| AF095771                  | Human PTH-responsive osteosarcoma B1 protein                     | 3               | 0.35         | N/A         |
| AL109839                  | Human genomic clone PR5-1069P2                                   | 2               | 0.35         | 0.09        |
| AB002305                  | Human KIAA0307 protein                                           | 2               | 0.37         | N/A         |
| AB023230                  | <i>Homo sapiens</i> mRNA for KIAA1013 protein                    | 3               | 0.37         | 0.05        |
| CSK_HUMAN                 | Human tyrosine protein kinase CSK (c-src-kinase)                 | 2               | 0.37         | N/A         |
| GBI1_HUMAN                | Human guanine nucleotide-binding protein G(I) $\alpha$ 1 subunit | 8               | 0.39         | 0.07        |
| EF1G_HUMAN                | Human elongation factor 1- $\gamma$                              | 2               | 0.40         | 0.05        |
| 143T_HUMAN                | 14-3-3 Protein tau / theta                                       | 4               | 0.41         | 0.10        |
| EM55_HUMAN                | Human 55 kDa erythroid membrane protein                          | 2               | 0.41         | N/A         |
| GRPH_HUMAN                | Human putative G-protein-coupled receptor                        | 3               | 0.41         | 0.11        |
| MYT1_HUMAN                | Human proteolipid protein-binding protein                        | 2               | 0.41         | N/A         |
| MYSN_HUMAN                | Human myosin heavy-chain non-muscle type A                       | 32              | 0.42         | 0.12        |

|            |                                                              |    |      |       |
|------------|--------------------------------------------------------------|----|------|-------|
| AC007229   | Human chromosome 19, cosmid R34187 hypothetical protein      | 2  | 0.43 | N/A   |
| G25B_HUMAN | Human G25K GTP-binding protein, brain isoform                | 7  | 0.43 | 0.04  |
| AF054825   | VAMP5 mRNA                                                   | 2  | 0.44 | N/A   |
| CD28_HUMAN | Human T-cell surface glycoprotein CD28                       | 7  | 0.44 | 0.11  |
| AB023204   | Human brain cDNA                                             | 2  | 0.48 | N/A   |
| AB039670   | Human armadillo repeat-containing protein                    | 2  | 0.48 | N/A   |
| ATND_HUMAN | Human sodium /potassium pump                                 | 5  | 0.49 | 0.07  |
| MLEN_HUMAN | Human non-muscle myosin light chain                          | 2  | 0.49 | 0.03  |
| SORC_HUMAN | Human 22 kDa sorcin protein                                  | 2  | 0.49 | 0.11  |
| T46447     | Human DKFZp434O1328.1 hypothetical protein                   | 2  | 0.50 | N/A   |
| ARP3_HUMAN | Human actin-like protein 3                                   | 2  | 0.5  | N/A   |
| COF1_HUMAN | Human non-muscle cofilin                                     | 10 | 0.51 | 0.05  |
| T46248     | Human DKFZp761112121.1 hypothetical protein                  | 2  | 0.52 | N/A   |
| ANX2_HUMAN | Human annexin II                                             | 4  | 0.52 | 0.02  |
| GUAA_HUMAN | Human GMP synthase, glutamine-amidotransferase               | 2  | 0.53 | 0.04  |
| RHOG_HUMAN | Human Rho-related GTP-binding protein                        | 2  | 0.53 | 0.11  |
| 143Z_HUMAN | 14-3-3 Protein zeta / delta                                  | 2  | 0.54 | N/A   |
| AB002320   | Human KIAA0322 protein                                       | 2  | 0.55 | N/A   |
| AB023220   | <i>Homo sapiens</i> mRNA for KIAA1003 protein                | 2  | 0.55 | 0.12  |
| AF035031   | MC57K Immunoglobulin light chain                             | 2  | 0.55 | N/A   |
| AF061936   | Human diacylglycerol kinase iota (DGKi)                      | 2  | 0.55 | 0.09  |
| PLSL_HUMAN | Human L-plastin lymphocyte protein                           | 8  | 0.55 | 0.08  |
| TPM4_HUMAN | Human tropomyosin                                            | 2  | 0.55 | N/A   |
| AB002315   | Human KIAA0317 hypothetical protein                          | 4  | 0.56 | 0.12  |
| AF027299   | 4.1G Membrane skeletal protein                               | 4  | 0.56 | 0.04  |
| T46391     | Human DKFZp434C0820.1 hypothetical protein                   | 2  | 0.56 | N/A   |
| T47172     | Human DKFZp762H186.1 hypothetical protein                    | 4  | 0.56 | 0.07  |
| AAAT_HUMAN | Transmembrane amino acid transporter                         | 8  | 0.56 | 0.02  |
| COPP_HUMAN | Human coatomer $\beta$ -subunit                              | 2  | 0.56 | N/A   |
| PEC1_HUMAN | Human platelet endothelial cell-adhesion molecule protein    | 6  | 0.56 | 0.13  |
| PRO1_HUMAN | Human profilin 1                                             | 8  | 0.56 | 0.08  |
| X67155     | Human mitotoc kinesin-like protein                           | 2  | 0.57 | N/A   |
| Y069_HUMAN | Human hypothetical protein KIAA0069                          | 3  | 0.57 | 0.06  |
| CAOP_HUMAN | Acyl-coenzyme A oxidase                                      | 2  | 0.58 | 0.10  |
| THRB_HUMAN | Human prothrombin protein                                    | 2  | 0.58 | N/A   |
| AB046852   | <i>Homo sapiens</i> mRNA for KIAA1632 protein                | 3  | 0.59 | 0.08  |
| AB047846   | $\gamma$ -COP protein                                        | 2  | 0.59 | N/A   |
| HAIR_HUMAN | Human putative zinc finger-containing protein                | 2  | 0.59 | 0.04  |
| IF2B_HUMAN | Human translation initiation factor 2 $\beta$ -subunit       | 2  | 0.59 | N/A   |
| AB037737   | <i>Homo sapiens</i> mRNA for KIAA1316 protein                | 2  | 0.60 | 0.17  |
| S74150     | T-cell receptor V $\alpha$ 2                                 | 2  | 0.60 | N/A   |
| T08769     | Human DKFZp586K011.1 hypothetical protein                    | 2  | 0.60 | N/A   |
| T14790     | Human DKFZp564P0562.1 hypothetical protein                   | 4  | 0.60 | 0.03  |
| ACTB_HUMAN | Human actin                                                  | 6  | 0.60 | 0.04  |
| RAC1_HUMAN | Human Ras-related C3 botulinum toxin substrate p21-Rac-1     | 13 | 0.60 | 0.07  |
| AB002303   | Human KIAA0305 protein                                       | 2  | 0.61 | 0.11  |
| S52920     | Human disintegrin MADM                                       | 3  | 0.61 | 0.06  |
| AF105367   | GLP2R G-Protein-coupled receptor for glucagon-like peptide 2 | 2  | 0.62 | 0.05  |
| AK022489   | Human clone MAMMA1003127                                     | 2  | 0.62 | 0.005 |
| PDI_HUMAN  | Human protein disulfide isomerase                            | 4  | 0.62 | 0.08  |

|            |                                                                             |    |      |      |
|------------|-----------------------------------------------------------------------------|----|------|------|
| PTN2_HUMAN | Human T-cell protein tyrosine phosphatase                                   | 2  | 0.62 | 0.08 |
| AB015631   | U937 cells type II membrane protein                                         | 2  | 0.63 | 0.14 |
| AK002158   | Human clone PLACE1009731                                                    | 4  | 0.63 | 0.11 |
| ANX6_HUMAN | Human annexin VI                                                            | 34 | 0.63 | 0.12 |
| CL14_HUMAN | Human intracellular chloride Channel protein 4                              | 3  | 0.63 | 0.05 |
| GBAK_HUMAN | Human guanine nucleotide-binding protein G(K) alpha-subunit (G(I) alpha-3)) | 25 | 0.63 | 0.14 |
| ITAL_HUMAN | Human integrin alpha 1, leukocyte adhesion glycoprotein LFa1                | 4  | 0.63 | 0.12 |
| AC006942   | Human chromosome 19, cosmid R31181 hypothetical protein                     | 2  | 0.64 | 0.01 |
| A57099     | DNA activated protein kinase                                                | 3  | 0.64 | 0.07 |
| B48089     | Growth arrest specific protein gas 6                                        | 2  | 0.64 | N/A  |
| 4F2_HUMAN  | Human lymphocyte cell-surface antigen type II membrane protein              | 13 | 0.64 | 0.08 |
| ATHL_HUMAN | Human potassium transporting ATPase alpha proton pump                       | 3  | 0.64 | 0.05 |
| CD1A_HUMAN | Human cell-surface glycoprotein CD1                                         | 3  | 0.64 | 0.04 |
| CD53_HUMAN | Human Leukocyte Surface antigen CD 53                                       | 5  | 0.64 | 0.05 |
| RS14_HUMAN | Human 40S ribosomal subunit s14                                             | 2  | 0.64 | 0.2  |
| AC006388   | Bac clone CTA-363M4 from 7q11.2-22                                          | 4  | 0.65 | N/A  |
| AF092137   | Human FK506-binding protein                                                 | 2  | 0.65 | 0.01 |
| ANX1_HUMAN | Human annexin 1                                                             | 16 | 0.65 | 0.10 |
| GBB2_HUMAN | Human guanine nucleotide-binding protein beta subunit 2                     | 13 | 0.65 | 0.13 |
| AT1K_HUMAN | Human putative phospholipid translocating ATPase                            | 7  | 0.66 | 0.04 |
| KPC1_HUMAN | Human protein kinase C beta-1 type                                          | 23 | 0.66 | 0.05 |
| NDK6_HUMAN | Human nucleoside diphosphate kinase                                         | 4  | 0.66 | 0.14 |
| PPT_HUMAN  | Human palmitoyl-protein thioesterase protein                                | 4  | 0.66 | 0.11 |
| AB046845   | <i>Homo sapiens</i> mRNA for KIAA1625 protein                               | 2  | 0.67 | N/A  |
| AF022815   | XAPC7 Proteosome subunit                                                    | 2  | 0.67 | N/A  |
| AF104415   | Gtl-13 mRNA                                                                 | 3  | 0.67 | 0.14 |
| AK001818   | <i>Homo sapiens</i> cDNA FLJ10956 fis                                       | 2  | 0.67 | 0.01 |
| U38272     | Mitochondrial cytochrome b                                                  | 2  | 0.67 | N/A  |
| JC7190     | Human D-2 hydroxyacid hydrogenase                                           | 2  | 0.67 | N/A  |
| G25P_HUMAN | Human G25K GTP-binding protein, placenta isoform                            | 4  | 0.67 | 0.05 |
| GBI2_HUMAN | Human guanine nucleotide-binding protein G(I) alpha 2 subunit               | 22 | 0.67 | 0.14 |
| KC2B_HUMAN | Human casein kinase                                                         | 3  | 0.67 | 0.05 |
| KPCL_HUMAN | Human protein kinase C eta type                                             | 2  | 0.67 | 0.05 |
| LDHM_HUMAN | Human 1-lactate dehydrogenase M chain                                       | 2  | 0.67 | N/A  |
| SRC_HUMAN  | Human proto-oncogene tyrosine kinase C-SRC                                  | 2  | 0.67 | 0.14 |
| AB020706   | Human brain cDNA                                                            | 3  | 0.68 | 0.08 |
| AB037796   | Human brain cDNA                                                            | 2  | 0.68 | N/A  |
| ANX7_HUMAN | Human annexin VII                                                           | 13 | 0.68 | 0.03 |
| GBB1_HUMAN | Human guanine nucleotide-binding protein beta subunit 1                     | 21 | 0.68 | 0.12 |
| ICA3_HUMAN | Human intracellular adhesion molecule-3                                     | 8  | 0.68 | 0.12 |
| KPCA_HUMAN | Human protein kinase C alpha type                                           | 6  | 0.68 | 0.11 |
| AC004812   | Human PAC clone 267D11 hypothetical protein                                 | 3  | 0.69 | N/A  |
| CLH1_HUMAN | Human clathrin heavy chain 1                                                | 27 | 0.69 | 0.04 |
| CORO_HUMAN | Human coronin-like protein p 57                                             | 26 | 0.69 | 0.04 |
| GBAF_HUMAN | Human guanine nucleotide-binding protein G(olfactory) alpha                 | 7  | 0.69 | 0.04 |
| LEG1_HUMAN | Human beta-galactoside-binding lectin 1-14-I                                | 4  | 0.69 | 0.03 |
| MYSA_HUMAN | Human myosin heavy chain                                                    | 6  | 0.69 | 0.05 |
| NUDM_HUMAN | Human mitochondrial NADH-ubiquinone oxidoreductase                          | 2  | 0.69 | N/A  |
| RAPA_HUMAN | Human Ras-related protein rap-1a                                            | 15 | 0.69 | 0.04 |
| SPCO_HUMAN | Human spectrin non-erythroid isoform beta-chain                             | 4  | 0.69 | 0.05 |

|            |                                                                    |    |      |      |
|------------|--------------------------------------------------------------------|----|------|------|
| A57017     | Rnase L inhibitor                                                  | 2  | 0.70 | 0.08 |
| AATM_HUMAN | Human mitochondrial aspartate aminotransferase                     | 2  | 0.70 | N/A  |
| DYL1_HUMAN | Human dynein light-chain 1                                         | 2  | 0.70 | N/A  |
| SMD2_HUMAN | Human small nuclear ribonucleoprotein SMD2                         | 2  | 0.70 | ,19  |
| AF021232   | TRAIL-R4A Receptor involved in apoptosis regulation                | 7  | 0.71 | 0.2  |
| 1B33_HUMAN | HLA-Class 1 histocompatibility antigen bw-60 transmembrane protein | 2  | 0.71 | N/A  |
| AK001434   | <i>Homo sapiens</i> cDNA FLJ10572 fis                              | 4  | 0.72 | N/A  |
| S78046     | Ribonuclease 6 protein                                             | 3  | 0.72 | 0.09 |
| G3P2_HUMAN | Human glyceraldehyde 3-phosphate dehydrogenase                     | 8  | 0.72 | 0.17 |
| MIF_HUMAN  | Human macrophage migration inhibitory factor                       | 8  | 0.72 | 0.03 |
| R13A_HUMAN | Human 60S ribosomal protein 113a                                   | 3  | 0.72 | 0.02 |
| SAP_HUMAN  | Human saposin A, sphingolipid activator protein 1                  | 33 | 0.72 | 0.12 |
| SR09_HUMAN | Human signal recognition particle 9 kDa protein                    | 4  | 0.72 | 0.12 |
| TPMN_HUMAN | Human tropomyosin cytoskeletal type                                | 4  | 0.72 | 0.11 |
| AB017165   | Human cDNA glycosylphosphatidylinositol biosynthesis               | 2  | 0.73 | N/A  |
| CYPM_HUMAN | Peptidyl-Prolyl <i>cis-trans</i> isomerase mitochondrial protein   | 2  | 0.73 | 0.20 |
| RUXF_HUMAN | Human small nuclear ribonucleoprotein                              | 5  | 0.73 | 0.08 |
| AK023350   | Human clone OVARC001167                                            | 2  | 0.74 | N/A  |
| AK025572   | Human clone HEP04019                                               | 2  | 0.74 | N/A  |
| B2MG_HUMAN | Beta-2 microglobulin protein                                       | 4  | 0.74 | N/A  |
| HS9B_HUMAN | Human heat shock protein HSB 90 kDa beta                           | 2  | 0.74 | 0.11 |
| MLRM_HUMAN | Human myosin regulatory light-chain 2                              | 2  | 0.74 | 0.02 |
| UBC7_HUMAN | Human ubiquitin-conjugating enzyme E2-18 kDa UBCH7                 | 2  | 0.74 | N/A  |
| AB023584   | Human rec protein                                                  | 2  | 0.75 | N/A  |
| AB046795   | Human KIAA1575 protein                                             | 2  | 0.75 | 0.05 |
| ABP2_HUMAN | Endothelial actin-binding protein                                  | 3  | 0.75 | 0.04 |
| L130_HUMAN | 130 kDa Leucine-rich protein (GP130)                               | 5  | 0.75 | 0.2  |
| MRP1_HUMAN | Human multi-drug resistance-associated protein 1                   | 2  | 0.75 | 0.12 |
| SPCB_HUMAN | Human spectrin beta-chain, erythroid isoform                       | 2  | 0.75 | N/A  |
| CD59_HUMAN | Human CD 59 glycoprotein                                           | 9  | 0.76 | 0.04 |
| CISY_HUMAN | Human citrate synthase mitochondrial protein                       | 2  | 0.76 | N/A  |
| CLCA_HUMAN | Clathrin light-chain A                                             | 3  | 0.76 | 0.02 |
| CLC4_HUMAN | Human chloride channel protein 4                                   | 2  | 0.76 | N/A  |
| CLC7_HUMAN | Human chloride channel protein 7                                   | 2  | 0.76 | 0.11 |
| LCK_HUMAN  | Human proto-oncogene tyrosine kinase LCK                           | 17 | 0.76 | 0.07 |
| SORT_HUMAN | Human sortilin glycoprotein 95, neurotensin receptor               | 3  | 0.77 | 0.04 |
| TBB1_HUMAN | Human tubulin beta-1 chain                                         | 22 | 0.77 | 0.09 |
| AB033054   | Human brain cDNA                                                   | 2  | 0.78 | N/A  |
| APAF_HUMAN | Human apoptosis protease activating factor                         | 3  | 0.78 | 0.05 |
| CAPB_HUMAN | F-Actin capping protein                                            | 2  | 0.78 | N/A  |
| CPT2_HUMAN | Human mitochondrial carnitine O-palmitoyltransferase               | 2  | 0.78 | N/A  |
| GRB2_HUMAN | Human growth factor receptor-bound protein 2                       | 4  | 0.78 | 0.11 |
| K6A6_HUMAN | Human Ribosomal Protein S6 Kinase alpha 6 (p90 RSK6)               | 2  | 0.78 | 0.12 |
| PP1A_HUMAN | Human serine threonine phosphatase PP1 alpha 1 catalytic subunit   | 9  | 0.78 | 0.07 |
| AF025531   | Human leukocyte immunoglobulin-like receptor-7 (LIR-7)             | 2  | 0.79 | 0.12 |
| AF077208   | Human HSPC022 mRNA                                                 | 5  | 0.79 | 0.06 |
| T17219     | Human DKFZp566H1924.1 hypothetical protein                         | 9  | 0.79 | 0.08 |
| ACTY_HUMAN | Human beta-centractin                                              | 2  | 0.79 | 0.02 |
| ALFA_HUMAN | Human aldolase                                                     | 5  | 0.79 | 0.11 |
| ANXA_HUMAN | Human annexin XI                                                   | 5  | 0.79 | 0.04 |

|            |                                                                      |    |      |      |
|------------|----------------------------------------------------------------------|----|------|------|
| ATCS_HUMAN | Human plasma membrane calcium-transporting ATPase isoform 4          | 3  | 0.79 | 0.13 |
| CRAR_HUMAN | Human complement-activating component of ra-reactive protein         | 3  | 0.79 | 0.16 |
| DHE3_HUMAN | Glutamate dehydrogenase 1                                            | 3  | 0.79 | N/A  |
| PLSI_HUMAN | Human I-plastin protein                                              | 6  | 0.79 | 0.03 |
| POR2_HUMAN | Human voltage-dependent anion selective channel protein 2 (hvdac2)   | 2  | 0.79 | N/A  |
| AF078857   | <i>Homo sapiens</i> PTD002 protein                                   | 3  | 0.80 | 0.09 |
| AF151825   | CGI-67 Protein                                                       | 9  | 0.80 | 0.06 |
| ADB1_HUMAN | Plasma membrane adaptor beta-adaptin 1                               | 7  | 0.8  | 0.04 |
| CAZ1_HUMAN | Human F-actin capping protein alpha-subunit                          | 2  | 0.80 | N/A  |
| DYN2_HUMAN | Human dynamin 2                                                      | 2  | 0.80 | 0.09 |
| R35A_HUMAN | Human 60S ribosomal protein 135a                                     | 6  | 0.80 | 0.15 |
| RL18_HUMAN | Human 60S ribosomal protein 118                                      | 2  | 0.80 | 0.15 |
| STB3_HUMAN | Human syntaxin-binding protein 3                                     | 7  | 0.8  | 0.2  |
| AB005754   | LAK-1 cDNA                                                           | 2  | 0.81 | 0.05 |
| CD7_HUMAN  | Human T-cell surface antigen CD 7 protein                            | 6  | 0.81 | 0.07 |
| ESTD_HUMAN | Human esterase D                                                     | 2  | 0.81 | 0.06 |
| RAC2_HUMAN | Human Ras-related C3 botulinum toxin substrate p21-Rac-2             | 8  | 0.81 | 0.08 |
| RS1A_HUMAN | Human 40S ribosomal subunit s15a                                     | 2  | 0.81 | 0.06 |
| AB018323   | <i>Homo sapiens</i> mRNA for KIAA0780 protein                        | 2  | 0.82 | 0.03 |
| AF093239   | Human MRS1 protein                                                   | 2  | 0.82 | N/A  |
| I141_HUMAN | Human Immunoglobulin-related 14.1 protein                            | 3  | 0.82 | 0.20 |
| ITA5_HUMAN | Human integrin alpha 5 fibronectin receptor protein                  | 2  | 0.82 | N/A  |
| RL32_HUMAN | Human 60S ribosomal protein 132                                      | 3  | 0.82 | 0.14 |
| RS29_HUMAN | Human 40S ribosomal subunit s29                                      | 8  | 0.82 | 0.17 |
| AB009671   | MDC2 and MDC3: novel human cellular disintegrins                     | 2  | 0.83 | 0.05 |
| AB040884   | Human brain cDNA                                                     | 4  | 0.83 | 0.03 |
| AK000562   | Human clone KAT11822                                                 | 2  | 0.83 | N/A  |
| CD45_HUMAN | Human leukocyte common antigen CD 45                                 | 76 | 0.83 | 0.14 |
| FVT1_HUMAN | Human follicular variant translocation protein 1                     | 2  | 0.83 | 0.12 |
| IF5A_HUMAN | Human initiation factor 5a                                           | 2  | 0.83 | N/A  |
| ITA4_HUMAN | Human integrin alpha 4 protein                                       | 4  | 0.83 | 0.06 |
| MYSO_HUMAN | Human myosin heavy-chain non-muscle type B                           | 5  | 0.83 | 0.11 |
| RL30_HUMAN | Human 60S ribosomal protein 130                                      | 3  | 0.83 | 0.15 |
| TCPG_HUMAN | Human T-complex protein 1, gamma-subunit                             | 2  | 0.83 | N/A  |
| ACON_HUMAN | Human mitochondrial aconitase                                        | 2  | 0.84 | N/A  |
| ATC2_HUMAN | Human endoplasmic reticulum ATPase isoform 2 calcium pump            | 16 | 0.84 | 0.15 |
| FRIL_HUMAN | Human ferritin light chain                                           | 3  | 0.84 | N/A  |
| MPRI_HUMAN | Human insulin-like growth factor receptor II / CI-MPR                | 5  | 0.84 | 0.07 |
| POR3_HUMAN | Human voltage-dependent anion-selective channel protein 3 (VDAC3)    | 10 | 0.84 | 0.13 |
| RIB1_HUMAN | Human dolichyl-diphospho-oligosaccharide protein glycosyltransferase | 4  | 0.84 | 0.12 |
| RL3_HUMAN  | Human 60S ribosomal protein 13                                       | 8  | 0.84 | 0.15 |
| RLA0_HUMAN | Human 60S acidic ribosomal protein p0                                | 6  | 0.84 | 0.14 |
| ROH1_HUMAN | Human HNRNP protein h                                                | 3  | 0.84 | 0.11 |
| T12471     | Human DKFZp564E1962.1 hypothetical protein                           | 2  | 0.85 | N/A  |
| ADB_HUMAN  | Plasma membrane adaptor beta-adaptin                                 | 5  | 0.85 | 0.08 |
| AOPP_HUMAN | Human putative peroxisomal antioxidant enzyme                        | 4  | 0.85 | 0.05 |
| ATN3_HUMAN | Human sodium /potassium pump                                         | 13 | 0.85 | 0.15 |
| CNE3_HUMAN | Human copine III, hypothetical protein KIAA0636                      | 9  | 0.85 | 0.09 |
| CTE2_HUMAN | Human acyl coenzyme A thioester hydrolase                            | 5  | 0.85 | 0.04 |

|            |                                                                     |    |      |      |
|------------|---------------------------------------------------------------------|----|------|------|
| RS12_HUMAN | Human 40S ribosomal subunit s12                                     | 2  | 0.85 | 0.12 |
| AF053356   | Hypothetical chromosome 7q22 protein                                | 2  | 0.86 | N/A  |
| EAT1_HUMAN | Human excitatory amino acid transporter 1                           | 2  | 0.86 | 0.1  |
| RAPB_HUMAN | Human Ras-related protein rap-1b                                    | 13 | 0.86 | 0.03 |
| RS3_HUMAN  | Human 40S ribosomal subunit s3                                      | 8  | 0.86 | 0.12 |
| I37405     | Human EC.2.4.1.41 protein <i>N</i> -acetylgalactosaminyltransferase | 5  | 0.87 | 0.05 |
| T08729     | Human DKFZ protein                                                  | 5  | 0.87 | 0.11 |
| CD1C_HUMAN | Human cell surface glycoprotein CD1c                                | 2  | 0.87 | 0.12 |
| RL9_HUMAN  | Human 60S ribosomal protein 19                                      | 6  | 0.87 | 0.13 |
| STB2_HUMAN | Human syntaxin-binding protein 2                                    | 2  | 0.87 | N/A  |
| TERA_HUMAN | Human transitional endoplasmic reticulum ATPase                     | 4  | 0.87 | 0.16 |
| AF208850   | BM-008 protein                                                      | 4  | 0.88 | 0.12 |
| ARS1_HUMAN | Human arsenite-translocating ATPase, arsenic pump                   | 2  | 0.88 | N/A  |
| C1S_HUMAN  | Human complement C1S esterase component                             | 2  | 0.88 | 0.2  |
| NP_001530  | Human DNA J-protein Hololog 2                                       | 2  | 0.88 | 0.14 |
| FK38_HUMAN | Human 38 kDa FK 506 binding protein homolog                         | 2  | 0.88 | N/A  |
| GBLP_HUMAN | Human guanine nucleotide-binding protein beta-subunit homolog       | 6  | 0.88 | 0.13 |
| YCE7_HUMAN | Human hypothetical protein CGI-147                                  | 2  | 0.88 | 0.08 |
| AF161347   | HSPC084 Protein                                                     | 2  | 0.89 | N/A  |
| T46915     | Human DKFZp762A227.1 hypothetical protein                           | 2  | 0.89 | N/A  |
| ATPE_HUMAN | Human mitochondrial ATP synthase epsilon-chain                      | 5  | 0.89 | 0.04 |
| RL4_HUMAN  | Human 60S ribosomal protein 14                                      | 5  | 0.89 | 0.11 |
| RL7A_HUMAN | Human 60S ribosomal protein 17a                                     | 5  | 0.89 | 0.14 |
| RS5_HUMAN  | Human 40S ribosomal subunit s5                                      | 3  | 0.89 | 0.11 |
| TBA4_HUMAN | Human tubulin alpha-4 chain                                         | 5  | 0.89 | 0.12 |
| TRFL_HUMAN | Human lactotransferrin protein                                      | 2  | 0.89 | N/A  |
| AK025068   | Human clone COL04030                                                | 2  | 0.9  | N/A  |
| CRTC_HUMAN | Human calreticulin protein                                          | 18 | 0.90 | 0.20 |
| DDX3_HUMAN | Human dead box protein 3                                            | 3  | 0.90 | 0.02 |
| EF11_HUMAN | Human elongation factor 1-alpha                                     | 3  | 0.90 | 0.02 |
| P4HA_HUMAN | Human prolyl 4-hydroxylase alpha-subunit                            | 14 | 0.90 | 0.05 |
| PUR2_HUMAN | Human trifunctional purine biosynthetic protein adenosine -3        | 3  | 0.90 | 0.05 |
| RS11_HUMAN | Human 40S ribosomal subunit s11                                     | 10 | 0.90 | 0.12 |
| MCP_HUMAN  | Human membrane cofactor leukocyte antigen protein                   | 5  | 0.91 | 0.04 |
| P23_HUMAN  | Human HSP 90 co-chaperone progesterone receptor complex p23         | 4  | 0.91 | 0.11 |
| RS27_HUMAN | Human 40S ribosomal subunit s27                                     | 5  | 0.91 | 0.06 |
| RSP4_HUMAN | Human 40S ribosomal subunit sa p40                                  | 3  | 0.91 | 0.04 |
| AK023722   | Human clone PLACE1011586                                            | 2  | 0.92 | N/A  |
| DRN2_HUMAN | Deoxyribonuclease 2 precursor                                       | 6  | 0.92 | 0.06 |
| ER21_HUMAN | Human KDEL receptor 1 protein for ER localization                   | 2  | 0.92 | 0.16 |
| ITB1_HUMAN | Human integrin beta 1 fibronectin receptor protein                  | 11 | 0.92 | 0.02 |
| RB48_HUMAN | Human chromatin assembly factor 1, p48 Rb binding protein           | 2  | 0.92 | 0.06 |
| RL12_HUMAN | Human 60S ribosomal protein 112                                     | 13 | 0.92 | 0.04 |
| RS28_HUMAN | Human 40S ribosomal subunit s28                                     | 5  | 0.92 | 0.11 |
| RS3A_HUMAN | Human 40S ribosomal subunit s3a                                     | 16 | 0.92 | 0.11 |
| A47161     | Mac-2 binding glycoprotein L3 antigen macrophage scavenger receptor | 5  | 0.93 | 0.04 |
| T13156     | Human KIAA0747 hypothetical protein                                 | 5  | 0.93 | 0.07 |
| MA32_HUMAN | Human hyaluronan binding protein 1                                  | 2  | 0.93 | 0.01 |
| SATT_HUMAN | Human neutral amino acid transporter                                | 5  | 0.93 | 0.12 |
| SERC_HUMAN | Human phosphoserine aminotransferase                                | 2  | 0.93 | N/A  |

|            |                                                                                |    |      |      |
|------------|--------------------------------------------------------------------------------|----|------|------|
| SNAH_HUMAN | Human alpha-soluble NSF attachment protein                                     | 5  | 0.93 | 0.09 |
| AF053700   | Human deltex (Dx) protein                                                      | 2  | 0.94 | 0.06 |
| AF085361   | HSPC032 mRNA                                                                   | 3  | 0.94 | 0.02 |
| AF105365   | K-C1 Co-transporter KCC4                                                       | 2  | 0.94 | 0.07 |
| AF260566   | HRS Isoform 2                                                                  | 2  | 0.94 | 0.06 |
| 6PGD_HUMAN | 6-Phosphogluconate dehydrogenase                                               | 5  | 0.94 | 0.14 |
| ATPQ_HUMAN | Human mitochondrial ATP synthase d-chain                                       | 2  | 0.94 | 0.02 |
| BASI_HUMAN | Human basigen leukocyte activation protein                                     | 12 | 0.94 | 0.04 |
| CD5_HUMAN  | Human T-cell surface glycoprotein CD 5 protein                                 | 24 | 0.94 | 0.07 |
| DEST_HUMAN | Human destrin, actin polymerizing factor                                       | 3  | 0.94 | N/A  |
| RAB8_HUMAN | Human Ras-related protein rab-8                                                | 10 | 0.94 | 0.14 |
| TCPH_HUMAN | Human T-complex protein 1, eta-subunit                                         | 5  | 0.94 | 0.02 |
| AK000427   | Human clone KAT02462                                                           | 4  | 0.95 | 0.09 |
| AF217187   | Human PPA2 protein                                                             | 4  | 0.95 | 0.01 |
| C1TC_HUMAN | Human tetrahydrofolate synthase                                                | 2  | 0.95 | N/A  |
| CN37_HUMAN | Human 2',3'-cyclic nucleotide -3'-phosphodiesterase                            | 7  | 0.95 | 0.07 |
| ECH1_HUMAN | Human delta3,5-delta2,4-dienoyl-CoA isomerase protein                          | 4  | 0.95 | 0.05 |
| KPY1_HUMAN | Human pyruvate kinase M1 isozyme                                               | 2  | 0.95 | 0.07 |
| RS17_HUMAN | Human 40S ribosomal subunit s17                                                | 2  | 0.95 | 0.06 |
| SEM1_HUMAN | Human seminogelin I protein (alpha-inhibin)                                    | 2  | 0.95 | N/A  |
| AB020645   | Human brain cDNA                                                               | 2  | 0.96 | 0.40 |
| AL391254   | Putative serine/threonine kinase                                               | 2  | 0.96 | N/A  |
| T08764     | Human DKFZp586C021.1 hypothetical protein                                      | 2  | 0.96 | N/A  |
| 1A80_HUMAN | HLA-Class 1 histocompatibility antigen aw-80 alpha-chain transmembrane protein | 2  | 0.96 | 0.15 |
| A2HS_HUMAN | Human fetuin, alpha-2 z globulin                                               | 9  | 0.96 | 0.09 |
| CD3G_HUMAN | Human T-cell surface glycoprotein CD3 gamma-chain                              | 5  | 0.96 | 0.11 |
| CYPH_HUMAN | Peptidyl-prolyl <i>cis-trans</i> isomerase A protein (PPlase)                  | 29 | 0.96 | 0.07 |
| ITB2_HUMAN | Human integrin beta-2 cell surface glycoprotein LFa1/cr3/p150.95               | 25 | 0.96 | 0.03 |
| RS16_HUMAN | Human 40S ribosomal subunit s16                                                | 3  | 0.96 | 0.08 |
| THIM_HUMAN | Human mitochondrial t1 beta-ketothiolase                                       | 2  | 0.96 | 0.08 |
| AB033767   | <i>Homo sapiens</i> BSCv mRNA                                                  | 3  | 0.97 | 0.08 |
| 1A01_HUMAN | HLA-Class 1 histocompatibility antigen A-1 alpha-chain transmembrane protein   | 3  | 0.97 | 0.04 |
| CATB_HUMAN | Human cathepsin B protein                                                      | 3  | 0.97 | N/A  |
| GBQ_HUMAN  | Human guanine nucleotide-binding protein G(q) alpha-subunit                    | 2  | 0.97 | 0.05 |
| IDHP_HUMAN | Human isocitrate dehydrogenase mitochondrial protein                           | 18 | 0.97 | 0.04 |
| T50630     | Human DKFZp762N0610.1 hypothetical protein                                     | 2  | 0.98 | 0.04 |
| DHB4_HUMAN | Human estradiol 17beta-dehydrogenase 4                                         | 6  | 0.98 | N/A  |
| HEXB_HUMAN | Human beta-hexosaminidase beta-chain protein                                   | 4  | 0.98 | 0.02 |
| PGK1_HUMAN | Human phosphoglycerate kinase isoform 1                                        | 5  | 0.98 | 0.04 |
| THIK_HUMAN | Human peroxisomal beta-ketothiolase                                            | 5  | 0.98 | 0.06 |
| THIL_HUMAN | Human mitochondrial t2 beta-ketothiolase                                       | 4  | 0.98 | 0.01 |
| TRFE_HUMAN | Human serotransferrin protein                                                  | 7  | 0.98 | 0.03 |
| TRSR_HUMAN | Human transferrin receptor protein, CD71 antigen                               | 7  | 0.98 | 0.05 |
| UCR1_HUMAN | Human ubiquinol-cytochrome c reductase complex core Protein                    | 3  | 0.98 | 0.02 |
| AK001410   | Human clone NT2RP2001969                                                       | 2  | 0.99 | N/A  |
| I38968     | Human 100 kDa coactivator for TFIIE                                            | 2  | 0.99 | 0.06 |
| CNBP_HUMAN | Human cellular nucleic acid-binding protein                                    | 3  | 0.99 | 0.04 |
| GDIB_HUMAN | Human Rab GDP dissociation inhibitor beta                                      | 2  | 0.99 | N/A  |
| RS20_HUMAN | Human 40S ribosomal subunit s20                                                | 2  | 0.99 | 0.02 |
| TGT_HUMAN  | Human tRNA-guanine transglycosylase                                            | 2  | 0.99 | 0.01 |

|            |                                                                     |    |      |      |
|------------|---------------------------------------------------------------------|----|------|------|
| ZN07_HUMAN | Human zinc finger protein 7, Krox 4                                 | 2  | 0.99 | 0.05 |
| AB002352   | Human mRNA for KIAA0354                                             | 3  | 1.00 | 0.12 |
| AB023187   | Human brain cDNA                                                    | 3  | 1.00 | 0.03 |
| ADT2_HUMAN | Human ADP/ATP translocase 2                                         | 11 | 1.00 | 0.09 |
| ATPG_HUMAN | Human mitochondrial ATP synthase gamma-chain                        | 5  | 1.00 | 0.05 |
| CATM_HUMAN | Human cathepsin 12 protein                                          | 4  | 1.00 | 0.02 |
| CLI1_HUMAN | Human intracellular chloride channel protein 1                      | 2  | 1.00 | 0.03 |
| IF2G_HUMAN | Human translation initiation factor 2 gamma-subunit                 | 3  | 1.00 | N/A  |
| TCPE_HUMAN | Human T-complex protein 1, epsilon-subunit                          | 11 | 1.00 | 0.14 |
| AB043635   | Human protein PAR-6B                                                | 4  | 1.01 | 0.04 |
| U59435     | p38-2G4 Homolog                                                     | 5  | 1.01 | 0.04 |
| AB040462   | Foocen protein                                                      | 10 | 1.01 | 0.11 |
| ENOA_HUMAN | Human alpha-enolase                                                 | 4  | 1.01 | 0.1  |
| IMD2_HUMAN | Inosine 5'-phosphate dehydrogenase 2                                | 2  | 1.01 | N/A  |
| PCP_HUMAN  | Human lysosomal Pro-X carboxypeptidase protein, angiotensinase C    | 2  | 1.01 | 0.07 |
| RL14_HUMAN | Human 60S ribosomal protein 114                                     | 2  | 1.01 | 0.04 |
| AB020698   | <i>Homo sapiens</i> mRNA for KIAA0891 protein                       | 2  | 1.02 | 0.04 |
| CTOG_HUMAN | Human colonic and hepatic tumor overexpressed protein               | 3  | 1.02 | N/A  |
| EFTU_HUMAN | Human mitochondrial elongation factor Tu                            | 9  | 1.02 | 0.05 |
| GLYM_HUMAN | Human mitochondrial serine hydroxymethyltransferase                 | 3  | 1.02 | 0.03 |
| POR1_HUMAN | Human voltage-dependent anion selective channel protein 1 (hvdac1)  | 10 | 1.02 | 0.03 |
| RHOA_HUMAN | Human transforming protein RhoA                                     | 2  | 1.02 | 0.11 |
| RL10_HUMAN | Human 60S ribosomal protein 110                                     | 3  | 1.02 | 0.07 |
| RL1X_HUMAN | Human 60S ribosomal protein 118a                                    | 2  | 1.02 | 0.05 |
| TCPA_HUMAN | Human T-complex protein 1, alpha-subunit                            | 8  | 1.02 | 0.22 |
| AF037204   | Zinc finger protein RZF                                             | 2  | 1.03 | N/A  |
| I38902     | Human RIZ protein                                                   | 2  | 1.03 | N/A  |
| BGAL_HUMAN | Human beta-galactosidase protein                                    | 2  | 1.03 | 0.02 |
| EF2_HUMAN  | Human elongation factor 2                                           | 9  | 1.03 | 0.03 |
| IEFS_HUMAN | Transformation-sensitive protein                                    | 7  | 1.03 | 0.05 |
| RL28_HUMAN | Human 60S ribosomal protein 128                                     | 2  | 1.03 | 0.06 |
| AF042284   | Human unknown mRNA                                                  | 2  | 1.04 | N/A  |
| AJ131186   | NMP200 Protein                                                      | 2  | 1.04 | N/A  |
| ATN1_HUMAN | Human sodium /potassium pump                                        | 36 | 1.04 | 0.14 |
| EP1_HUMAN  | Human secretory protein E1                                          | 6  | 1.04 | 0.12 |
| IF37_HUMAN | Human translation initiation factor 3 subunit 7                     | 2  | 1.04 | 0.11 |
| RS2_HUMAN  | Human 40S ribosomal subunit s2                                      | 4  | 1.04 | 0.05 |
| AK002135   | Human clone PLACE1009338                                            | 4  | 1.05 | 0.09 |
| CLC3_HUMAN | Human chloride channel protein 3                                    | 2  | 1.05 | N/A  |
| RL24_HUMAN | Human 60S ribosomal protein 124                                     | 7  | 1.05 | 0.09 |
| VAB2_HUMAN | Human vacuolar ATP synthase endomembrane proton pump                | 4  | 1.05 | 0.04 |
| RL3L_HUMAN | Human 60S ribosomal protein 13-like                                 | 4  | 1.06 | 0.11 |
| CTR1_HUMAN | Human high-affinity cationic amino acid transporter 1               | 4  | 1.07 | 0.04 |
| RL34_HUMAN | Human 60S ribosomal protein 134                                     | 3  | 1.07 | 0.06 |
| UCRH_HUMAN | Human ubiquinol-cytochrome c reductase mitochondrial 11 kDa protein | 2  | 1.07 | N/A  |
| U28811     | Human cysteine-rich FGF receptor                                    | 13 | 1.08 | 0.05 |
| DIMH_HUMAN | Human Diminuto-like protein                                         | 2  | 1.08 | N/A  |
| SERA_HUMAN | Human d-3-phosphoglycerate dehydrogenase                            | 4  | 1.08 | 0.02 |
| HS7C_HUMAN | Human heat-shock cognate 71 kDa protein                             | 4  | 1.09 | 0.06 |

|            |                                                               |    |      |      |
|------------|---------------------------------------------------------------|----|------|------|
| RAB2_HUMAN | Human Ras-related protein rab-2                               | 3  | 1.09 | N/A  |
| TBB2_HUMAN | Human tubulin beta-2-chain                                    | 3  | 1.09 | 0.04 |
| VAT0_HUMAN | Human vacuolar ATP synthase 69 kDa subunit                    | 4  | 1.09 | 0.07 |
| AB023202   | <i>Homo sapiens</i> mRNA for KIAA0985 protein                 | 2  | 1.1  | N/A  |
| CALG_HUMAN | Human calmegrin protein                                       | 2  | 1.10 | 0.12 |
| CATC_HUMAN | Human cathepsin C                                             | 14 | 1.10 | 0.05 |
| CLN5_HUMAN | Human CLN5 putative transmembrane protein                     | 2  | 1.10 | N/A  |
| LDHH_HUMAN | Human 1-lactate dehydrogenase H chain                         | 14 | 1.1  | 0.04 |
| MTDC_HUMAN | Human mitochondrial methylene tetrahydrofolate dehydrogenase  | 3  | 1.10 | 0.01 |
| RS21_HUMAN | Human 40S ribosomal subunit s21                               | 7  | 1.10 | 0.09 |
| RS6_HUMAN  | Human 40S ribosomal subunit s6                                | 2  | 1.10 | 0.09 |
| AF195951   | SRP 68 Signal recognition particle protein                    | 2  | 1.11 | 0.14 |
| TDXM_HUMAN | Human mitochondrial thioredoxin-dependent peroxide reductase  | 2  | 1.11 | N/A  |
| AB020650   | <i>Homo sapiens</i> mRNA for KIAA0843 protein                 | 2  | 1.12 | 0.08 |
| PRTP_HUMAN | Human lysosomal protective protein cathepsin a                | 2  | 1.12 | N/A  |
| CYPB_HUMAN | Peptidyl-prolyl <i>cis-trans</i> isomerase B protein (PPIase) | 8  | 1.13 | 0.07 |
| HCD2_HUMAN | Human endoplasmic reticulum amyloid-binding protein           | 2  | 1.13 | 0.15 |
| AB033047   | <i>Homo sapiens</i> mRNA for KIAA1221 protein                 | 4  | 1.14 | 0.10 |
| TCPD_HUMAN | Human T-complex protein 1, delta-subunit                      | 3  | 1.14 | 0.12 |
| AF155111   | NY-REN-49 protein                                             | 2  | 1.15 | 0.1  |
| VATA_HUMAN | Human vacuolar ATP synthase a                                 | 4  | 1.15 | 0.10 |
| AB011145   | Human brain cDNA                                              | 6  | 1.16 | 0.18 |
| SAHH_HUMAN | Human adenosyl homocysteinase                                 | 2  | 1.17 | N/A  |
| AF065163   | KNCK3 potassium channel protein                               | 2  | 1.19 | N/A  |
| AF071787   | Human MLN1 putative melanoma metastasis suppressor            | 3  | 1.20 | 0.05 |
| DLDH_HUMAN | Dihydropyrimidine dehydrogenase mitochondrial protein         | 6  | 1.20 | 0.05 |
| IF38_HUMAN | Human translation initiation factor 3 subunit 8               | 2  | 1.20 | 0.01 |
| PSD1_HUMAN | Human 26S proteasome regulatory subunit s1                    | 4  | 1.20 | 0.02 |
| AC005764   | Hypothetical protein, chromosome 19                           | 2  | 1.21 | N/A  |
| ER60_HUMAN | Human protein disulfide isomerase ER-60                       | 2  | 1.22 | 0.04 |
| GR75_HUMAN | Mitochondrial stress protein GRP 75                           | 10 | 1.22 | 0.12 |
| RANG_HUMAN | Human Ran-specific GTPase-activating protein (ranbp1)         | 2  | 1.23 | N/A  |
| ARGR_HUMAN | Human arginine-rich protein                                   | 4  | 1.25 | 0.18 |
| LMP1_HUMAN | Human lysosome-associated membrane glycoprotein 1             | 7  | 1.25 | 0.07 |
| AF032922   | UNC-18c SNARE protein involved in syntaxin-4 binding          | 2  | 1.27 | N/A  |
| TDXN_HUMAN | Human thioredoxin-dependent peroxide reductase a0372          | 5  | 1.28 | 0.05 |
| CY1_HUMAN  | Human cytochrome <i>c1</i> , heme protein                     | 2  | 1.29 | N/A  |
| IDHG_HUMAN | Human isocitrate dehydrogenase gamma-mitochondrial protein    | 2  | 1.30 | 0.03 |
| NASP_HUMAN | Human protein known to be expressed in sperm                  | 2  | 1.30 | N/A  |
| RAB7_HUMAN | Human Ras-related protein rab-7                               | 7  | 1.30 | 0.10 |
| AF144700   | TIM13 Mitochondrial import protein                            | 5  | 1.31 | 0.15 |
| AF077035   | Hypothetical HSPC011 mRNA                                     | 2  | 1.32 | N/A  |
| CATA_HUMAN | Human Catalase A                                              | 3  | 1.32 | 0.10 |
| HEXA_HUMAN | Human beta-hexosaminidase alpha-chain protein                 | 2  | 1.32 | 0.09 |
| AF132965   | CGI-31 protein                                                | 2  | 1.33 | N/A  |
| T17320     | Human DKFZp564J0863.1 hypothetical protein                    | 2  | 1.33 | 0.09 |
| HCDH_HUMAN | Human short-chain 3-hydroxyacyl-CoA dehydrogenase             | 3  | 1.33 | 0.08 |
| LEGU_HUMAN | Human asparaginyl-endopeptidase                               | 3  | 1.33 | 0.09 |
| LMP2_HUMAN | Human lysosome-associated membrane glycoprotein 2             | 5  | 1.33 | 0.04 |
| AB012958   | Xeroderma pigmentosum (XP) cell line                          | 2  | 1.35 | N/A  |

|            |                                                                     |    |      |      |
|------------|---------------------------------------------------------------------|----|------|------|
| G19P_HUMAN | Human protein kinase C substrate, 80 kDa heavy chain                | 6  | 1.35 | 0.04 |
| AB020679   | <i>Homo sapiens</i> mRNA for KIAA0872 protein                       | 2  | 1.40 | 0.07 |
| JC4916     | Signal-transducing adaptor containing SH3 domain and ITAM motif     | 2  | 1.40 | N/A  |
| BCR_HUMAN  | Human breakpoint cluster region protein                             | 2  | 1.40 | N/A  |
| NP_002416  | Human stromelysin-2 /mmp 10 Protein                                 | 2  | 1.40 | 0.02 |
| LAM1_HUMAN | Human laminin beta 1                                                | 2  | 1.40 | N/A  |
| P60_HUMAN  | Human mitochondrial matrix heat shock protein                       | 2  | 1.40 | 0.07 |
| QOR_HUMAN  | Human quinone oxidoreductase                                        | 3  | 1.40 | 0.11 |
| JG0186     | Human VAMP-vesicle-associated membrane protein-associated protein B | 2  | 1.43 | 0.06 |
| CD38_HUMAN | Human lymphocyte cell surface antigen CD 38                         | 2  | 1.47 | 0.18 |
| CD69_HUMAN | Human early T-cell activation antigen                               | 2  | 1.50 | 0.03 |
| COPA_HUMAN | Human coatomer alpha-subunit                                        | 8  | 1.50 | 0.11 |
| ER29_HUMAN | Human endoplasmic reticulum protein ER 29                           | 2  | 1.54 | N/A  |
| I53171     | Pantophysin                                                         | 5  | 1.60 | 0.2  |
| DRS1_HUMAN | Human DBI-related protein 1                                         | 2  | 1.60 | N/A  |
| COXB_HUMAN | Human cytochrome c oxidase VB protein                               | 3  | 1.67 | N/A  |
| COXG_HUMAN | Human cytochrome c oxidase VIB protein                              | 2  | 1.67 | N/A  |
| AF055470   | <i>Homo sapiens</i> ZNF258 (ZNF258)                                 | 2  | 1.70 | 0.17 |
| CD1E_HUMAN | Human cell surface glycoprotein CD1e                                | 7  | 1.75 | 0.07 |
| MPRD_HUMAN | Human cation-dependent mannose 6-phosphate receptor                 | 4  | 1.75 | 0.05 |
| AB002293   | Human KIAA0295 protein                                              | 2  | 1.80 | 0.04 |
| VATG_HUMAN | Human vacuolar ATP synthase subunit g-13 kDa                        | 2  | 1.80 | N/A  |
| AK026541   | Human clone KAT03934                                                | 2  | 1.90 | 0.1  |
| ENPL_HUMAN | Human endoplasmin precursor                                         | 3  | 1.90 | N/A  |
| AF037439   | Human protein kinase A-anchoring protein                            | 3  | 2.00 | 0.03 |
| MDHM_HUMAN | Human mitochondrial malate dehydrogenase                            | 6  | 2.00 | 0.2  |
| ODPX_HUMAN | Human mitochondrial pyruvate dehydrogenase                          | 4  | 2.00 | N/A  |
| ROA1_HUMAN | Human single-strand binding HNRNP core protein                      | 3  | 2.02 | 0.07 |
| CD97_HUMAN | CD 97 cell surface G-protein coupled receptor                       | 10 | 2.08 | 0.03 |
| PTN3_HUMAN | Human protein tyrosine phosphatase h1                               | 2  | 2.12 | N/A  |
| AF192466   | CHORD containing protein-1                                          | 2  | 2.20 | 0.08 |
| AF006464   | Human muscle-specific tyrosine kinase receptor (MUSK)               | 2  | 2.5  | 0.04 |
| AF056085   | Human GABA-B G-protein coupled receptor                             | 2  | 2.50 | 0.17 |
| AB002313   | Human brain cDNA                                                    | 3  | 2.55 | 0.16 |
| AB002358   | Human mRNA for KIAA0360 gene                                        | 2  | 2.70 | N/A  |
| AB037837   | <i>Homo sapiens</i> mRNA for KIAA1416 protein                       | 2  | 2.70 | N/A  |
| NP_006242  | Human cDNA AMP-activated protein kinase a                           | 2  | 3.00 | N/A  |
| AB037736   | Human brain cDNA                                                    | 2  | 3.00 | N/A  |
| PTN1_HUMAN | Human protein tyrosine phosphatase 1 B                              | 4  | 3.20 | 0.02 |
| AF191298   | VPS 35 sorting protein                                              | 4  | 3.40 | 0.04 |
| AB046772   | Human KIAA1552 protein                                              | 2  | 4.00 | 0.04 |
| AB017169   | Human cDNA                                                          | 2  | 4.06 | 0.14 |
| AF072832   | Human UbcH 7-binding protein                                        | 2  | 4.5  | N/A  |
| FGD1_HUMAN | Human Rho/Rac guanine exchange factor                               | 2  | 4.56 | 0.10 |
| AB028981   | <i>Homo sapiens</i> mRNA for KIAA1058 protein                       | 2  | 5.00 | 0.07 |
| AB046851   | Human brain cDNA                                                    | 2  | 5.00 | 0.05 |
| AF203687   | Human prolactin regulatory element-binding protein (PREB)           | 3  | 5.10 | 0.14 |
| AF223468   | AD021 Protein                                                       | 2  | 5.21 | N/A  |
| YES_HUMAN  | Human proto-oncogene tyrosine kinase YES                            | 4  | 5.88 | 0.04 |
| AB015982   | <i>Homo sapiens</i> EPK2 mRNA for serine/threonine kinase           | 2  | 6.00 | 0.04 |

|            |                                                              |   |       |      |
|------------|--------------------------------------------------------------|---|-------|------|
| NP_0055173 | <i>Homo sapiens</i> mRNA for macrophage C-type lectin Mincle | 2 | 6.00  | 0.12 |
| AB033065   | <i>Homo sapiens</i> mRNA for KIAA1239 protein                | 2 | 6.00  | 0.16 |
| AF024631   | <i>Homo sapiens</i> ANG2 (ANG2) protein                      | 2 | 6.00  | N/A  |
| AF070418   | Human embryonic ectoderm development protein mRNA            | 5 | 6.00  | 0.14 |
| AB040916   | <i>Homo sapiens</i> mRNA for KIAA1483 protein                | 2 | 6.30  | 0.12 |
| U70735     | COP-9 subunit 6 homolog                                      | 2 | 6.70  | 0.05 |
| LONM_HUMAN | Human mitochondrial serine protease                          | 2 | 8.2   | N/A  |
| AB038995   | Human RAB-8b Ras-related protein                             | 5 | 8.33  | 0.14 |
| KPCT_HUMAN | Human protein kinase C theta type                            | 2 | 11.45 | 0.12 |

**Supplementary Table 2. Selected classes of proteins identified and quantified**

**Cell surface receptors**

| Protein name | Protein function and classification                | d0:d8 | s.d. |
|--------------|----------------------------------------------------|-------|------|
| CD28_HUMAN   | Human T-cell surface glycoprotein CD28             | 0.44  | 0.11 |
| PEC1_HUMAN   | Human platelet endothelial cell-adhesion protein 1 | 0.56  | 0.13 |
| S52920       | Human disintegrin MDAM                             | 0.61  | 0.06 |
| ITAL_HUMAN   | Leukocyte adhesion glycoprotein LFA-1              | 0.63  | 0.12 |
| CD1A_HUMAN   | Human cell surface glycoprotein CD1                | 0.64  | 0.04 |
| CD53_HUMAN   | Human leukocyte surface glycoprotein CD 53         | 0.64  | 0.05 |
| SICA3_HUMAN  | Human intracellular adhesion molecule 3            | 0.68  | 0.12 |
| 1B33_HUMAN   | HLA-class 1 histocompatibility antigen bw-60       | 0.71  | N/A  |
| CD59_HUMAN   | Human CD 59 glycoprotein                           | 0.76  | 0.04 |
| CD45_HUMAN   | Human leukocyte common antigen CD45                | 0.77  | 0.05 |
| CD7_HUMAN    | Human T-cell surface antigen CD 7                  | 0.81  | 0.07 |
| ITA5_HUMAN   | Human integrin fibronectin receptor alpha-subunit  | 0.82  | N/A  |
| ITA4_HUMAN   | Human integrin alpha-4 precursor                   | 0.83  | 0.06 |
| MPRI_HUMAN   | Human insulin-like growth factor receptor II       | 0.84  | 0.07 |
| CD1_HUMAN    | Human cell surface glycoprotein CD1c               | 0.87  | 0.12 |
| ITB1_HUMAN   | Human fibronectin receptor integrin beta 1         | 0.92  | 0.02 |
| CD5_HUMAN    | Human T-cell glycoprotein CD 5                     | 0.94  | 0.07 |
| BASI_HUMAN   | Human basigin leukocyte activation protein         | 0.94  | 0.04 |
| 1A80_HUMAN   | HLA-Class 1 histocompatibility antigen aw-80       | 0.96  | 0.15 |
| CD3G_HUMAN   | Human T-cell surface glycoprotein CD3              | 0.96  | 0.11 |
| ITB2_HUMAN   | Human integrin beta-2, lfa1/cr3/p150.95            | 0.96  | 0.03 |
| 1A01_HUMAN   | HLA-Class 1 histocompatibility antigen A-1alpha    | 0.97  | 0.04 |
| TRSR_HUMAN   | Human CD-71 antigen, transferrin receptor          | 0.98  | 0.05 |
| CD38_HUMAN   | Human lymphocyte cell surface antigen CD 38        | 1.47  | 0.18 |
| CD69_HUMAN   | Human early T-cell activation antigen              | 1.50  | 0.03 |
| CD1E_HUMAN   | Human cell surface glycoprotein CD1e               | 1.75  | 0.07 |
| MPRD_HUMAN   | Human mannose 6-phosphate receptor                 | 1.75  | 0.05 |
| CD97_HUMAN   | CD 97 Cell surface G-protein coupled receptor      | 2.08  | 0.03 |

## Membrane channels and transport proteins

|            |                                                       |      |      |
|------------|-------------------------------------------------------|------|------|
| ATND_HUMAN | Human sodium/potassium pump                           | 0.49 | 0.07 |
| CLI4_HUMAN | Human intracellular chloride channel protein 4        | 0.63 | 0.05 |
| ATHL_HUMAN | Human potassium-transporting ATPase alpha             | 0.64 | 0.05 |
| CLC4_HUMAN | Human chloride channel protein 4                      | 0.76 | N/A  |
| CLC7_HUMAN | Human chloride channel protein 7                      | 0.76 | 0.11 |
| ATCS_HUMAN | Human sodium/potassium pump                           | 0.79 | 0.13 |
| POR2_HUMAN | Human voltage-dependent anion-selective channel       | 0.79 | N/A  |
| ATC2_HUMAN | Human calcium pump, ATPase isoform 2                  | 0.83 | 0.15 |
| POR3_HUMAN | Human voltage-dependent anion-selective channel       | 0.84 | 0.13 |
| ATN3_HUMAN | Human sodium/potassium pump                           | 0.85 | 0.15 |
| SATT_HUMAN | Human neutral amino acid transporter                  | 0.93 | 0.12 |
| CLI1_HUMAN | Human intracellular chloride channel protein 1        | 1.00 | 0.03 |
| POR1_HUMAN | Human voltage-dependent anion-selective channel       | 1.02 | 0.03 |
| ATN1_HUMAN | Human sodium/potassium pump                           | 1.04 | 0.14 |
| CLC3_HUMAN | Human chloride channel protein 3                      | 1.05 | N/A  |
| CTR1_HUMAN | Human high-affinity cationic amino acid transporter 1 | 1.07 | 0.04 |

## Kinases and phosphatases

|            |                                           |       |      |
|------------|-------------------------------------------|-------|------|
| KPCA_HUMAN | Human protein kinase C alpha-type         | 0.68  | 0.11 |
| KPCL_HUMAN | Human protein kinase C eta-type           | 0.67  | 0.05 |
| KPC1_HUMAN | Human protein kinase C beta-1 type        | 0.66  | 0.05 |
| KPY1_HUMAN | Human pyruvate kinase M1 isozyme          | 0.95  | 0.01 |
| LCK_HUMAN  | Human proto-oncogene tyrosine kinase Lck  | 0.76  | 0.07 |
| NDK6_HUMAN | Human nucleoside diphosphate kinase       | 0.66  | 0.14 |
| PGK1_HUMAN | Human phosphoglycerate kinase isoform 1   | 0.98  | 0.04 |
| SRC_HUMAN  | Human proto-oncogene tyrosine kinase Src  | 0.67  | 0.14 |
| PP1A_HUMAN | Human serine threonine phosphatase PP1A   | 0.78  | 0.07 |
| PTN2_HUMAN | Human T-cell protein tyrosine phosphatase | 0.62  | 0.08 |
| YES_HUMAN  | Human proto-oncogene tyrosine kinase Yes  | 5.88  | 0.04 |
| CSK_HUMAN  | Human tyrosine protein kinase CSK         | 0.37  | N/A  |
| PTN3_HUMAN | Human protein tyrosine phosphatase h1     | 2.12  | N/A  |
| AB022017   | Human AMP-activated protein kinase A      | 3.00  | N/A  |
| PTN1_HUMAN | Human protein tyrosine phosphatase 1B     | 3.2   | 0.02 |
| KPCT_HUMAN | Human protein kinase C theta-type         | 11.45 | 0.12 |

## Guanine nucleotide-binding proteins, exchange factors, and farnesyl transferase

|            |                                                               |      |      |
|------------|---------------------------------------------------------------|------|------|
| FTFD_HUMAN | Human farnesyl-diphosphate farnesyl transferase (SQS) 0.05    | 0.02 |      |
| GBI1_HUMAN | Human guanine nucleotide-binding protein G(I) alpha-1 subunit | 0.39 | 0.07 |
| G25B_HUMAN | Human G25K GTP-binding protein, brain isoform                 | 0.43 | 0.04 |
| RHOG_HUMAN | Human Rho-related GTP-binding protein                         | 0.53 | 0.11 |
| RAC1_HUMAN | Human Ras-related C3 toxin substrate p21-Rac1                 | 0.6  | 0.07 |
| GBAK_HUMAN | Human guanine nucleotide-binding protein G(K) alpha           | 0.63 | 0.14 |
| GBB2_HUMAN | Human guanine nucleotide-binding protein beta-subunit 2       | 0.65 | 0.13 |
| G25P_HUMAN | Human G25K GTP-binding protein, placenta isoform              | 0.67 | 0.05 |
| GBI2_HUMAN | Human guanine nucleotide-binding protein G(I) alpha-2 subunit | 0.67 | 0.14 |
| GBB1_HUMAN | Human guanine nucleotide-binding protein beta-subunit 1       | 0.68 | 0.12 |
| GBAF_HUMAN | Human guanine nucleotide-binding protein G(olfactory) alpha   | 0.69 | 0.04 |
| RAPA_HUMAN | Human Ras-related protein rap-1a                              | 0.69 | 0.04 |
| RAC2_HUMAN | Human Ras-related C3 toxin substrate p21-Rac2                 | 0.81 | 0.08 |
| RAPB_HUMAN | Human Ras-related protein rap-1b                              | 0.86 | 0.03 |
| GBLP_HUMAN | Human guanine nucleotide-binding protein beta-subunit 0.88    | 0.13 |      |
| RAB8_HUMAN | Human Ras-related protein rab-8                               | 0.94 | 0.14 |
| GBQ_HUMAN  | Human guanine nucleotide-binding protein G(q) alpha1          | 0.97 | 0.05 |
| RHOA_HUMAN | Human transforming protein RhoA                               | 1.02 | 0.11 |
| RAB2_HUMAN | Human Ras-related protein rab-2                               | 1.09 | N/A  |
| RANG_HUMAN | Human Ran-specific GTPase-activating protein ranbp1           | 1.23 | N/A  |
| RAB7_HUMAN | Human Ras-related protein rab-7                               | 1.3  | 0.10 |
| FGD1_HUMAN | Human Rho/Rac guanine exchange factor                         | 4.56 | 0.10 |

Protein names are given according to the NCBI protein database nomenclature (<http://www.ncbi.nlm.nih.gov>). Protein description was extracted from the same database. Abundance ratios are shown as ratio of d0:d8 peptide signals (d0, naïve cells; d8, PMA-treated cells).
